1 **Body image and appearance distress among military veterans and civilians with an injury-related**  
2 **visible difference: A comparison study**

3 **Short Title: Body image and appearance distress among injured military veterans.**

4 Mary Keeling<sup>1#a\*</sup>, Diana Harcourt<sup>1</sup>, Paul White <sup>2</sup>, Sarah Evans<sup>1</sup>, Victoria S. Williams, V<sup>1#b</sup>, James  
5 Kiff<sup>1#c</sup>, & Heidi Williamson<sup>1</sup>.

6 <sup>1</sup> Centre for Appearance Research, Department of Social Sciences, Faculty of Health and Applied  
7 Sciences, University of the West of England, Frenchay Campus, Bristol, BS16 1QY, England.

8 <sup>2</sup> Department of Engineering, Design and Mathematics, Faculty of Environment and Technology,  
9 University of the West of England.

10 <sup>a</sup> Current address: Defence and Security, RAND Europe, Eastbrook House, Shaftesbury Road,  
11 Cambridge, CB2 8BF.

12 <sup>b</sup> Current address: North Bristol NHS Trust, Southmead Road, Bristol, BS10 5NB

13 <sup>c</sup> Current address: Clinical Psychologist, Outlook Team, Southmead Hospital, North Bristol NHS Trust,  
14 England.  
15

16 \*Corresponding author

17 Email: [mkeeling@randeurope.org](mailto:mkeeling@randeurope.org) (MK)

18 **Abstract**

19 Injuries sustained during military conflict can significantly impact appearance. Yet, little is known  
20 about the psychosocial experiences of veterans with conflict-related appearance-altering injuries  
21 (AAI) and whether current civilian interventions are appropriate for veterans. To inform the  
22 development of acceptable and effective support for veterans with appearance-related psychosocial  
23 difficulties, this study aimed to identify factors associated with psychosocial adjustment to an  
24 altered appearance among both veterans and civilians with AAI. A cross-sectional online survey  
25 study was conducted. N = 121 veterans and N = 197 civilians who had sustained AAI took part.  
26 Multivariable regression was used to examine factors related to adjustment in the two  
27 groups. Overall, both groups reported similar experiences, with some key exceptions. Veterans  
28 reported significantly greater depression and Post Traumatic Stress Disorder, significantly lower  
29 Body Image (BI) psychological flexibility, BI life engagement, and higher perceived appearance-  
30 related stigma. BI psychological flexibility was identified as a key predictor of appearance-related  
31 outcomes in both groups. Self-compassion predicted social anxiety and depression symptoms in  
32 both groups, but only appearance outcomes among civilians. Based on these identified associated  
33 factors, it is suggested that both groups, but particularly veterans, may benefit from an Acceptance  
34 and Commitment Therapy-based intervention, including explicit self-compassion activities, and  
35 practical social skills training.

36 **Key words:** Body image; Veterans; Combat-injuries; Acceptance; Commitment.

37

38

39

40

41

## 42 **Introduction**

43 Military conflict injuries can profoundly affect appearance. UK Ministry of Defence data shows that  
44 between April 2005 and March 2020, 10,100 current and former military personnel received  
45 compensation due to 'injury, wounds, and scarring' (1), and 362 received traumatic or surgical  
46 amputations (1). Despite substantial research on altered appearance (visible  
47 difference/disfigurement) from various causes, there has been limited focus on the unique  
48 experiences and support requirements of military personnel and veterans with appearance-altering  
49 injuries (AAI) from military conflict.

50 Outside the military context, looking different from the norm due to factors like burn injuries or limb  
51 loss can lead to enduring psychosocial challenges including negative effects on body image, self-  
52 esteem, and confidence (Clarke et al., 2014) and feelings of anger and hostility (3). Common  
53 difficulties include coping with stigmatizing reactions from others such as staring, inappropriate  
54 comments, avoidance, and unsolicited questions (4), concerns around the impact on intimate  
55 relationships when disclosing their difference, and on employment (5). While some individuals  
56 effectively navigate these challenges and report personal growth (Martin et al., 2017), others  
57 struggle, experiencing social avoidance and isolation in response to others' reactions and the fear of  
58 negative judgment (Clarke et al, 2014).

59 Whilst there is considerable similarity in the challenges reported by people with an unusual  
60 appearance irrespective of its type or cause (6), understanding the factors influencing adjustment is  
61 crucial. Research with burns patients highlights the importance of paying particular attention to  
62 appearance-related issues when supporting people who have endured traumatic injuries (Shepherd,  
63 2015). Among 1,265 non-military adults with diverse visible differences, Rumsey et al (2014) showed  
64 the significance of psychosocial factors, rather than demographics or condition-related aspects.  
65 Specifically, outlook on life (disposition) and feeling accepted and supported by others positively  
66 influenced outcomes including social anxiety and avoidance. Valence (the value attributed to

67 appearance) and the importance (salience) of appearance in the self-concept may also contribute to  
68 adjustment (Clarke et al., 2014). A review of research with burns patients found that avoidant coping  
69 was associated with negative adjustment, and active or acceptance coping with positive adjustment  
70 (9). Recently, psychological flexibility, characterized by the ability to stay present despite distressing  
71 thoughts, feelings, and bodily sensations, and aligning decisions with personal values (10), has been  
72 examined in relation to appearance-related distress amongst adults with burns (Shepherd et al.,  
73 2019) and other visible differences (12).

74 It's crucial not to assume that the experience of having an altered appearance, the factors affecting  
75 outcomes, and support requirements, are identical for individuals with military-related injuries  
76 compared to those without military backgrounds. To date, there has been limited exploration of the  
77 impact of being part of an organisation where physical prowess is key, and of the influence of  
78 military culture that values mental toughness and devalues signs of weakness.

79 A recent review (13) found only four papers specifically addressing body image and psychosocial  
80 issues among military personnel and veterans with AAI. Weaver et al. (2014) discovered positive  
81 correlations between body image distress and depressive symptoms, with a trend towards body  
82 image distress being associated with symptoms of post-traumatic stress disorder (PTSD) among  
83 military veterans with AAI. Similarly, Akyol et al. (2013) found body image distress was linked to self-  
84 reported depressive symptoms among 60 Turkish military personnel with lower limb amputations.  
85 Two case studies of US military male upper limb amputees (16) mentioned the impact of appearance  
86 concerns on social relationships. While most research in this area has primarily involved men, Cater  
87 (2012) noted body image issues among six US servicewomen who experienced traumatic limb loss  
88 and described loss of confidence and concern about how they were viewed by the public, including  
89 challenges around meeting new people and dealing with hurtful comments. Factors including a  
90 positive attitude, social support, personal courage, resilience, humor, and military training and  
91 culture, positively influenced their recovery. Keeling et al.'s (2020) review concluded that injured  
92 personnel and veterans with AAI can encounter psychosocial challenges akin to those experienced

93 by civilians with visible differences. However, additional factors, including military culture, may  
94 influence their adjustment and resilience to appearance-related challenges, impacting their support  
95 needs.

96 We previously interviewed 20 veterans and 3 serving personnel who had sustained AAI during  
97 deployment or training. While some experiences aligned with civilian evidence, these interviews  
98 revealed distinct military-related nuances in challenges, protective factors, coping strategies, and  
99 barriers to and preferences for support (18). Notably, our interviews indicated that acceptance and  
100 adjustment could hinge on perceptions of injury likelihood and a 'hierarchy of injuries' where  
101 combat-related injuries were viewed as 'heroic.' Peer support, an optimistic disposition, compassion,  
102 and drawing comparisons with others' injuries were also influential. Participants wanted support  
103 with appearance-related challenges but expressed concerns that, in a military context, raising  
104 appearance-related issues might be seen as vanity. This underscores the existence of unmet support  
105 needs among UK military personnel and veterans with AAI, emphasizing the necessity to better  
106 understand adjustment in this group.

107 To date, no large-scale studies have compared people with AAI from military and civilian  
108 backgrounds, to determine the extent to which the psychosocial impact of their AAI and the factors  
109 influencing their adjustment are similar or different. To address this gap in the literature and to  
110 inform the provision of evidence-based psychosocial support to meet any specific needs of military  
111 veterans with AAI, this exploratory study aimed to answer the question, to what extent are the  
112 factors that predict psychosocial adjustment to an altered appearance among UK military veterans  
113 injured in a military conflict context similar or different to those that predict adjustment among a  
114 comparative sample of adults without a military background?

115 For this study, and based on the presented existing literature, adjustment was conceptualised as  
116 satisfaction with appearance (body esteem), the impact of appearance-related concerns on  
117 participation in social, recreational, and vocational activities (body image life engagement), the level

118 of concern about being negatively judged based on appearance (fear of negative appearance  
119 evaluation), as well as social anxiety and depression. Factors believed to influence adjustment  
120 included body image psychological flexibility, self-compassion, engagement in meaningful activities,  
121 perceived social support, perceived appearance-related stigmatization, dispositional outlook  
122 (optimism), the use of appearance-fixing behaviors (efforts to conceal, alter, or avoid one's  
123 appearance), and symptoms of PTSD. Consequently, hypotheses of associations between  
124 appearance and psychological outcomes and the proposed predictor factors, for civilians and  
125 veterans, are:

126 Body Image psychological flexibility (a domain-specific version of psychological flexibility), self-  
127 compassion, engagement in meaningful activities, optimism and social support will be positively  
128 associated with body esteem and body image life engagement, and negatively associated with fear  
129 of negative appearance evaluation, social anxiety, and depression. Appearance fixing, perceived  
130 stigma and PTSD will be negatively associated with body esteem and body image life engagement,  
131 and positively associated with fear of negative appearance evaluation, social anxiety, and  
132 depression.

## 133 **Method**

### 134 ***Design***

135 A cross-sectional survey was utilised including two participant groups, veterans (those who have left  
136 military service), and civilians with AAI.

### 137 ***Sample and Participants***

138 Following Tabachnick & Fidell (2013), based on the inclusion of eight validated predictor variables,  
139 we aimed to recruit 120 veterans who had sustained an AAI. This target was inflated to 200 to allow  
140 non-validated predictor variables to probe the model. For comparability we additionally aimed for a  
141 target sample of 200 civilians with AAI who had never served in the military.

142 Participants were 121 veterans who had sustained an appearance-altering (as they perceive it)  
143 physical injury either during operational deployment as a result of enemy action (e.g., blast or  
144 gunshot) or an accident (e.g., a motor vehicle accident); or during field training in preparation for  
145 operational deployment. This must have been during active service in the UK Armed Forces any time  
146 since 1969 (to include those injured in ‘The Troubles’ in Northern Ireland, the Falklands conflict, and  
147 First Gulf War, as well as more recent conflicts). The injury must have occurred at least one year  
148 prior to participation, excluding those in acute medical recovery and rehabilitation. The civilian  
149 sample consisted of 197 adults with no military background who sustained an AAI (as they perceive  
150 it) such as a burn or limb loss, when aged 18 years or older, between 1969 and at least one year  
151 prior to data collection.

## 152 ***Materials***

153 Two surveys were created for data collection from veteran and civilian participants. The surveys  
154 were identical, except for veteran-specific questions covering military service details and  
155 experiences identified in a prior qualitative study as potential predictors of body image and  
156 appearance-related outcomes. The research team, drawing on expertise in visible differences, body  
157 image, and military health, and the results of the previous qualitative study conducted by the  
158 authors (18), developed the surveys with input from Public and Patient Involvement (PPI) advisors,  
159 with relevant lived experiences. The surveys covered: Socio-demographics; Military career (veterans  
160 only); Injury-specific questions; Being a veteran (veterans only); Health and fitness; Appearance  
161 concerns; Social wellbeing; Mental health; Family and relationships; Support experiences, barriers to  
162 care and support preferences (veterans only).

## 163 ***Procedure***

164 After obtaining ethics approval from the University of the West of England, University Research  
165 Ethics Committee (Ref: HAS.19.12.086) and Health Research Authority (IRAS ID: 257931), participant  
166 recruitment followed a six-pronged approach: 1. Veteran participants from a prior qualitative study

167 (18) were invited via email, having consented to future research contact. 2. Relevant veteran and  
168 civilian support organizations shared study information via their usual communication modes and/or  
169 shared study invites directly with eligible service users. 3. Relevant NHS services across England and  
170 Wales, including outpatients' clinics for burns and prosthetics services shared study adverts via their  
171 usual communication modes and/or shared study invites directly with eligible service users, and/or  
172 distributed paper surveys to individuals attending the service in-person. 4. Study adverts shared on  
173 social media via Twitter, Instagram, and Facebook. 5. Study information posted on Reddit. 6.  
174 Advertisements placed in relevant veteran magazines.

175 Potential participants, upon seeing the study advert or receiving an invitation letter, accessed a  
176 secure online survey via Qualtrics. Emailed or paper versions of the survey were also made available  
177 for those preferring these mediums. Participant recruitment took place between March and  
178 November 2020. In both versions, participants provided written informed consent on the first page  
179 of the survey before progressing to the survey questions. Due to the recruitment approach, the  
180 exposure count for study invitations is unknown, rendering a response rate unavailable.

## 181 ***Measures***

### 182 Outcome measures

183 Six validated outcome measures (three appearance and three mental health) were included in both  
184 survey versions.

#### 185 *Appearance Outcome measures*

186 The Appearance Esteem subscale (10 items) of the Body Esteem Scale for Adults and Adolescents  
187 (**BESAA-AE**) (Mendelson et al., 2001) assesses general feelings and satisfaction with appearance  
188 (e.g., "I worry about the way I look") using a 5-point scale (never to always). Mean scores, indicating  
189 greater body esteem with higher values, were computed. The scale has demonstrated reliability and  
190 validity in adults and adolescents (20), and internal consistency in this study was high ( $\alpha = 0.932$ ),



191 consistent with prior research in adults with visible differences due to burn scarring ( $\alpha = 0.95$ ;  
192 Lawrence et al., 2006)

193 The Body Image Life Engagement Questionnaire (**BILEQ**; Diedrichs et al., 2016) measures the wider  
194 impact of appearance-related concerns on various life domains, focusing on behavioral avoidance  
195 due to negative feelings about one's appearance. Participants were asked, "In the past two weeks,  
196 how much have worries or feeling bad about the way you looked stopped you from doing any of the  
197 following things?" The 11-item scale covered social, recreational, and educational/vocational  
198 activities (e.g., "doing physical activity/sport") on a 4-point scale (1 = hasn't stopped me at all to 4 =  
199 stopped me all the time). All items were reverse-scored, and a mean was calculated. Higher scores  
200 denoted greater life engagement. The scale demonstrated good internal consistency ( $\alpha = 0.924$ ),  
201 consistent with prior research with female adults (Diedrichs et al., 2016).

202 The Fear of Negative Appearance Evaluation Scale (**FNAES**; Lundgren et al., 2004) assesses  
203 participants' concern about others evaluating them negatively based on their appearance. Six  
204 statements (e.g., "I am concerned about what others think of my appearance") are rated on a 5-  
205 point scale (1 = Not at all to 5 = Extremely). Scores are summed with a higher score indicating  
206 greater fear of negative appearance evaluation. The scale has demonstrated construct and  
207 predictive validity in undergraduate college students (Lundgren et al., 2004) and good internal  
208 consistency in adults born with cleft lip and palate (Ardouin et al., 2020). In this study, internal  
209 consistency was high ( $\alpha = 0.938$ ).

#### 210 *Mental Health Outcome Measures*

211 Two sub-scales from The Social Anxiety Scale for Adolescents (SAS-A; La Greca & Lopez, 1998)  
212 measured social anxiety: social avoidance and distress in new situations (**SAS-new**) and social  
213 avoidance and distress in general (**SAS-general**). SAS-new includes six statements (e.g., "I get  
214 nervous when I meet new people"), while SAS-general comprises four (e.g., "I feel shy even with  
215 peers I know very well"). Both are rated on a 5-point scale (1 = not at all, 5 = all the time), with

216 higher scores indicating greater social anxiety. Satisfactory Cronbach's alphas have been reported  
217 for the subscales (0.83 for SAS-new and 0.76 for SAS-general; La Greca & Lopez, 1998). Internal  
218 consistency in the current study was  $\alpha = 0.913$  for SAS-new and  $\alpha = 0.872$  for SAS-general.

219 The Patient Health Questionnaire-9 (**PHQ-9**; Kroenke et al., 2001) assesses depression symptoms  
220 across the nine Diagnostic and Statistical Manual criteria. Individuals rate the extent to which they  
221 have been bothered by each symptom over the past two weeks using a 4-point scale ('not at all' to  
222 'nearly every day'). Scores range from 0 to 27, with 5–9 indicating 'mild depression' and a clinical cut  
223 point score of 10 or above indicating moderate to severe depression. The PHQ-9 demonstrates  
224 strong internal consistency (Cronbach's  $\alpha = 0.89$ ) and test-retest reliability ( $r = 0.84$ ) (Kroenke et al.,  
225 2001). Internal consistency in the current study was  $\alpha = 0.919$ .

226 Explanatory variables

227 Explanatory variables included eight validated measures aligned with the study hypothesis and 12  
228 non-validated items (created by the authors) identified as potentially associated with appearance  
229 and body image experiences in a previous qualitative study (reference removed for blinded review).

230 The eight validated measures included:

231 The Body Image Acceptance and Action Questionnaire-5 (**BIAAQ-5**; (27)) measures body image  
232 flexibility (fully experiencing perceptions, sensations, feelings, thoughts, and beliefs about the body  
233 while intentionally pursuing effective action in other life domains), a component of positive body  
234 image. It consists of five items, addressing both acceptance and action. All items are reverse-scored  
235 and summed, with higher scores indicating greater body image flexibility. This version has  
236 demonstrated good reliability and validity in a mixed-gender sample of US adults (27). Minor edits  
237 were made, focusing on changed appearance instead of weight and body shape. Internal consistency  
238 in the current study was  $\alpha = 0.919$ .

239 The Appearance Fixing sub-scale of the Body Image Coping Strategies Inventory (**BICSI-AF**; Cash et  
240 al., 2005) measures participants' tendencies to cover, camouflage, seek reassurance, and engage in

241 social comparison regarding the aspect(s) of their appearance that concerns them. The 10-item sub-  
242 scale includes statements like "I make a special effort to hide or cover up what's troublesome about  
243 my looks," rated between 0 = definitely not like me and 3 = definitely like me. Higher mean scores  
244 indicate increased use of appearance-fixing coping strategies. It has demonstrated good internal  
245 consistency, construct, and convergent validity among college students (Cash et al., 2005) and good  
246 internal consistency in a sample of mixed-gender adults with a visible difference following head and  
247 neck cancer surgery (29). Internal consistency in the current study was  $\alpha = 0.907$ .

248 The Perceived Stigmatisation Questionnaire (**PSQ**; Lawrence et al., 2006) measures stigmatisation  
249 behaviours commonly experienced by people with a visible difference. It comprises three subscales:  
250 1. Absence of friendly behaviour, 2. Confused/staring behaviour, and 3. Hostile behaviour. A high  
251 score reflects high-perceived stigmatisation. The PSQ has demonstrated good internal consistency,  
252 and convergent and discriminant validity among a sample of mixed gender adult burn survivors  
253 (Lawrence et al., 2006). Internal consistency in the current study was  $\alpha = 0.899$ .

254 Self-compassion was measured using the 12-item Short Form of the Self Compassion Scale (**SCS-SF**;  
255 (Raes, Pommier, Neff, & Gucht, 2011). A mean score is calculated with higher scores indicating  
256 higher levels of self-compassion. The SCS-SF exhibits near perfect correlation with the full SCS and  
257 demonstrates good internal consistency with both Dutch and American university students (30). For  
258 this study, minor edits were made to improve readability as PPI advisors fed back that some items  
259 were difficult to understand. Internal consistency in the current study was  $\alpha = 0.895$ .

260 The Engagement in Meaningful Activities Survey (**EMAS**) is a validated 12-item measure of positive  
261 subjective experiences associated with day-to-day activities such as meaningful occupations ( $\alpha = .91$ ;  
262 (Eakman, 2012)). Internal consistency in the current study was  $\alpha = 0.924$ .

263 The Life Orientation Test – Revised (**LOT-R**) is a 10-item measure of dispositional optimism which has  
264 been shown to possess adequate predictive and discriminant validity (32). Internal consistency in the  
265 current study was  $\alpha = 0.848$ .

266 Multidimensional Scale of Perceived Social Support (**MSPSS**) is a validated measure of subjectively  
267 assessed social support across three areas of family, friends, and significant others (33). Internal  
268 consistency in the current study was  $\alpha = 0.941$ .

269 The Posttraumatic Stress Disorder (PTSD) items from the International Trauma Questionnaire (**ITQ**;  
270 Cloitre et al., 2018) consisted of six questions covering three symptom clusters: (1) re-experiencing  
271 in the here and now, (2) avoidance, and (3) sense of current threat. Additionally, three indicators of  
272 functional impairment associated with these symptoms were assessed. Respondents were asked to  
273 provide a brief description of 'the experience that troubles them the most,' and questions were  
274 answered in relation to that experience. A PTSD diagnosis requires endorsement of at least one  
275 symptom from each of the three clusters and at least one indicator of functional impairment. In  
276 addition to calculated PTSD case scores, summed PTSD scores were also calculated from individual  
277 item scores. The ITQ has been validated for use in the general population (Cloitre et al., 2018) and  
278 with treatment-seeking veterans (Murphy et al., 2020). Internal consistency in the current study was  
279 high ( $\alpha = 0.952$ ).

280 The 12 non-validated items included six veteran-specific items: (1) "Expecting to be injured" (six-  
281 point ordinal scale); (2) "Being seen as an injured veteran is a good thing" (five-point ordinal scale);  
282 (3) "Having other veterans close by who are recovering from similar injuries and changes to their  
283 appearance has been helpful" (five-point ordinal scale); (4) which operational deployment they were  
284 injured on e.g. Afghanistan; (5) "I would not feel comfortable talking about my altered appearance  
285 following my injury while in a military environment" (six-point ordinal scale); (6) whether injury was  
286 on deployment or training (binary); and six items common to both the veteran and civilian sample:  
287 (7) Number of years since injury; (8) "Being physically fit is important to me" (six-point ordinal scale);  
288 (9) I tend to say to myself "it could have been worse" (Binary); (10) "I feel disgust when I think about  
289 or look at my appearance / body" (five-point ordinal scale); (11) "I use humour to defuse awkward  
290 conversations about my injury and/or altered appearance" (4-point ordinal scale); (12) "How

291 noticeable do you think your scars / limb loss are to other people when you are fully clothed?" (11-  
292 point ordinal scale).

### 293 ***Method of analysis***

294 Each of the six outcome measures was compared between the veteran sample and the civilian  
295 sample using the separate variances independent samples t-test (Welch test) and effect size  
296 quantified using Hedge's  $g$  (with  $0.2 \leq g < 0.5$ ,  $0.5 \leq g < 0.8$ , and  $g \geq 0.8$  being indicative of a small,  
297 medium or large effect respectively).

298 Multivariable least squares regression was used to relate the validated explanatory variables to  
299 outcome variables in both samples separately, and in all cases underlying statistical assumptions for  
300 valid inference were examined with the plan of taking remedial action should the need arise.

301 Explanatory variables formed a mutually correlated system in both the veteran and civilian sample  
302 however the extent of multicollinearity, measured by the variance inflation factors (VIFs) were not a  
303 cause for concern for model building and interpretation (maximum VIF in the veteran population  
304 3.33; maximum VIF in the civilian population 3.32). The maximum absolute value for the extent of  
305 skew in model residuals in any model did not cast doubt on appropriateness of model (maximum  
306 skew = 0.72) however, one model in the civilian sample indicated a large degree of excess kurtosis  
307 (4.02) consistent with the presence of potential outliers. Inspection of Normal quantile-quantile  
308 plots indicated the presence of two outliers in the model with the highest kurtosis, but otherwise all  
309 other normal quantile-quantile plots did not cause doubt on model appropriateness. A sensitivity  
310 analysis undertaken by temporarily deleting the two ill-fitting observations left statistical conclusions  
311 unchanged, and as such models using all available data are reported.

312 Multivariable regression is based on complete cases.  $N = 113$  out of a sample of 121 veterans gave  
313 complete case data (i.e., 7% missing data in the veteran sample for at least one regression analysis).  
314  $N = 161$  out of a sample of 198 civilians gave complete case data (i.e., 19% missing data for at least  
315 one regression analysis). Little's MCAR tests was consistent with data missing completely at random

316 ( $\chi^2 = 77.920$ ,  $df = 100$ ,  $p = 0.950$ ). Full specification multiple imputation chained equations (MICE)  
317 was used with 100 imputations. The pooled regression results using MICE did not materially alter  
318 statistical conclusions except in two marginal cases. We therefore report the available case  
319 regression and additionally report the multiple imputed regression summaries in supplementary  
320 material.

321 Each of the six regression models were further probed in an exploratory manner using the 12 non-  
322 validated measures to determine if their inclusion would significantly improve the model and hence  
323 give an insight to additional factors affecting adjustment.

324 All statistical analysis was conducted using IBM SPSS for Windows, Version 24.0.

## 325 **Results**

326 Table 1 summarises demographic and injury information of the participants. Veterans (median age =  
327 42 years, age range 28 to 75 years) were typically older than civilians (median age = 35 years, age  
328 range 18 to 80) with the veteran sample being predominantly male (93.4%) and married (63.6%)  
329 compared with the civilian sample (60.1% male; 35.4% married). Both samples were predominantly  
330 of white ethnicity (96.7% veteran sample: 87.4% civilian sample). A higher proportion of civilians  
331 held graduate (37.8%) and postgraduate (28.7%) qualifications compared to veterans (21.9%  
332 graduate, 15.8% postgraduate). Civilians predominantly had scarring as their visible difference  
333 (85.9%), whereas veterans had a mix of scarring and limb loss (52.9%) or just scarring (46.3%). Sixty  
334 percent of veterans had been injured during enemy action. A third of the civilians were injured in  
335 road traffic or other transport-related accidents (32.3%), and just under a third in sport-related  
336 incidents (28.3%). Veterans on average had more years since their injury (18.11 mean years)  
337 compared to the civilians (8.02 mean years). Most veterans had served in the Army (82.6%) and  
338 were in the regular force at the time of their injury (98.3%). Among veterans, 47.9% held non-  
339 commissioned officer (NCO) rank, and 34.7% held ranks lower than NCO at the time of their injury.

340 Table 1 Demographics of sample

| <b>Gender</b>                                 | <b>Veterans n (%)</b> | <b>Civilians n (%)</b> |
|-----------------------------------------------|-----------------------|------------------------|
| Male                                          | 113 (93.4)            | 119 (60.1)             |
| Female                                        | 8 (6.6)               | 77(38.9)               |
| Prefer to self-describe                       | 0 (0.0)               | 1 (0.5)                |
| Prefer not to say                             | 0 (0.0)               | 1 (0.5)                |
| <b>Ethnicity</b>                              |                       |                        |
| Asian or Asian British                        | 0 (0.0)               | 5 (2.5)                |
| Black, African,<br>Black British or Caribbean | 1 (0.8)               | 3 (1.5)                |
| Mixed or multiple ethnicities                 | 0 (0.0)               | 9 (4.5)                |
| White                                         | 117 (96.7)            | 173 (87.4)             |
| Other ethnicity                               | 0 (0.0)               | 4 (2.0)                |
| Prefer not to say                             | 3 (2.5)               | 4 (2.0)                |
| <b>Relationship Status</b>                    |                       |                        |
| Single                                        | 14 (11.6)             | 54 (27.3)              |
| Relationship less than 6-months               | 3 (2.5)               | 4 (2.0)                |
| Relationship more than 6-months               | 1 (0.8)               | 23 (11.6)              |
| Living with partner                           | 13 (10.7)             | 37 (18.7)              |
| Married                                       | 77 (63.6)             | 70 (35.4)              |
| Separated                                     | 8 (6.6)               | 3 (1.5)                |
| Divorced                                      | 5 (4.1)               | 4 (2.0)                |
| Widowed                                       | 0 (0.0)               | 3 (1.5)                |
| <b>Education</b>                              |                       |                        |
| GCSEs or less                                 | 42 (36.8)             | 30 (16.0)              |
| A-levels or equivalent                        | 29 (25.4)             | 33 (17.6)              |
| Degree or equivalent                          | 25 (21.9)             | 71 (37.8)              |
| Postgraduate qualifications                   | 18 (15.8)             | 54 (28.7)              |
| <b>Type of injury</b>                         |                       |                        |
| Both limb-loss and scarring                   | 64 (52.9)             | 26 (13.3)              |
| Limb-loss                                     | 1 (0.8)               | 0 (0.0)                |
| Misshapen body part                           | 0 (0.0)               | 2 (1.0)                |
| Scars                                         | 56 (46.3)             | 170 (85.9)             |
| <b>Cause of injury</b>                        |                       |                        |
| Accident on deployment                        | 23 (19.0)             | -                      |
| Enemy action on deployment                    | 73 (60.3)             | -                      |
| Training accident                             | 25 (20.7)             | -                      |
| Accident/Explosion                            | -                     | 29 (14.6)              |
| Assault/Violent crime                         | -                     | 16 (8.1)               |
| Burns                                         | -                     | 31 (15.7)              |
| Road traffic accident/Transport               | -                     | 64 (32.3)              |
| Sport-related                                 | -                     | 58 (29.3)              |
| <b>Years since injury (mean; SD)</b>          | <b>18.11 (11.68)</b>  | <b>8.02 (9.49)</b>     |
| Range                                         | 2 – 32                | 1 - 48                 |
| <b>Military characteristics</b>               |                       |                        |
| <b>Service Branch</b>                         |                       |                        |
| Naval Services                                | 16 (13.2)             | -                      |
| Army                                          | 100 (82.6)            | -                      |
| Royal Air Force                               | 5 (4.1)               | -                      |
| <b>Rank</b>                                   |                       |                        |
| Other ranks                                   | 42 (34.7)             | -                      |

|                                                |              |   |
|------------------------------------------------|--------------|---|
| NCO                                            | 58 (47.9)    | - |
| Officer                                        | 21 (17.4)    | - |
| <b>Engagement type</b>                         |              | - |
| Regular                                        | 117 (98.3)   | - |
| Reserve                                        | 2 (1.7)      | - |
| <b>Years served in the military (mean; SD)</b> | 13.31 (7.62) | - |
| Range                                          | 2 - 32       | - |
| <b>Years served when injured (mean; SD)</b>    | 7.53 (6.08)  | - |
| Range                                          | 0 - 28       | - |

341

342 Table 2 summarises means and standard deviations for each validated measure for the veteran and  
 343 civilian samples. The statistical comparison for mean differences is in Table 3. There are significantly  
 344 lower sample means for veterans on the Body Image Life Engagement Questionnaire (**BILEQ**;  $p <$   
 345  $.001$ ,  $g = 0.64$ ) and on the Body Image Acceptance and Action Questionnaire (**BIAAQ**;  $p <$   $.001$ ,  $g =$   
 346  $0.46$ ). There are significantly higher sample means for veterans on the Patient Health Questionnaire-  
 347  $9$  (**PHQ-9**;  $p = .007$ ,  $g = 0.35$ ), the Body Image Coping Strategies Inventory – Appearance Fixing  
 348 (**BICSI-AF**;  $p = .036$ ,  $g = 0.25$ ), the Perceived Stigmatisation Questionnaire (**PSQ**;  $p <$   $.001$ ,  $g = 0.51$ )  
 349 and the International Trauma Questionnaire (**ITQ**;  $p = .001$ ,  $g = 0.42$ ).

350 Table 2 Mean score and standard deviation of all measures for veteran and civilian samples

| Measure     | Veteran |       |       | Civilian |       |       |
|-------------|---------|-------|-------|----------|-------|-------|
|             | N       | Mean  | SD    | N        | Mean  | SD    |
| BESAA-AE    | 121     | 2.23  | 0.988 | 198      | 2.42  | 0.913 |
| BILEQ       | 118     | 3.40  | 0.684 | 191      | 3.76  | 0.465 |
| FNAES       | 118     | 13.28 | 6.674 | 189      | 14.03 | 6.607 |
| SAS-new     | 113     | 15.40 | 6.749 | 175      | 16.89 | 6.418 |
| SAS-general | 113     | 9.24  | 4.175 | 175      | 9.54  | 3.956 |
| PHQ-9       | 113     | 9.35  | 7.457 | 174      | 7.05  | 6.004 |
| BIAAQ       | 120     | 26.50 | 7.863 | 194      | 29.64 | 6.668 |
| BICSI-AF    | 118     | 0.75  | 0.646 | 188      | 0.92  | 0.705 |
| PSQ         | 114     | 2.14  | 0.516 | 180      | 1.89  | 0.479 |
| SCS-SF      | 113     | 2.89  | 0.822 | 176      | 3.03  | 0.863 |
| EMAS        | 114     | 33.66 | 6.915 | 175      | 33.38 | 7.610 |
| LOT-R       | 113     | 12.25 | 5.336 | 174      | 12.89 | 5.117 |



|       |     |       |        |     |       |        |
|-------|-----|-------|--------|-----|-------|--------|
| MSPSS | 110 | 58.61 | 18.358 | 169 | 61.40 | 16.421 |
| ITQ   | 110 | 10.13 | 7.951  | 161 | 7.12  | 6.676  |

351

352 Table 3 Mean difference between veteran and civilian scores on all variables

| Measure     | Mean Difference | 95% CI         | p     | Hedge's g | 95% CI       |
|-------------|-----------------|----------------|-------|-----------|--------------|
| BESAA-AE    | -0.189          | -0.408, 0.029  | .089  | -0.20     | -0.34, 0.03  |
| BILEQ       | -0.361          | -0.501, -0.220 | <.001 | -0.64     | -0.88, -0.41 |
| FNAES       | -0.752          | -2.289, 0.784  | .336  | -0.11     | -0.34, 0.12  |
| SAS-new     | -1.487          | -3.062, 0.087  | .064  | -0.23     | -0.46, 0.01  |
| SAS-general | -0.304          | -1.277, 0.669  | .539  | -0.07     | -0.31, 0.16  |
| PHQ-9       | 2.293           | 0.645, 3.942   | .007  | 0.35      | 0.11, 0.59   |
| BIAAQ       | -3.139          | -4.840, -1.439 | <.001 | -0.44     | -0.67, -0.21 |
| BICSI-AF    | -0.166          | -0.320, -0.011 | .036  | -0.25     | -0.48, -0.02 |
| PSQ         | 0.256           | 0.137, 0.374   | <.001 | 0.51      | 0.27, 0.74   |
| SCS-SF      | -0.143          | -0.342, 0.056  | .157  | -0.16     | -0.40, 0.07  |
| EMAS        | 0.281           | -1.425, 1.987  | .746  | 0.04      | -0.20, 0.27  |
| LOT-R       | -0.643          | -1.893, 0.607  | .312  | -0.12     | -0.36, 0.11  |
| MSPSS       | -2.787          | -7.042, 1.467  | .198  | -0.16     | -0.40, 0.08  |
| ITQ         | 3.003           | 1.184, 4.822   | .001  | 0.42      | 0.17, 0.66   |

353

354 Table 4 presents Pearson correlation coefficients for each predictor-outcome combination in both  
355 samples. For the veteran sample, all correlation coefficients exceed the critical values for significance  
356 at the 5% level (critical value: .174, n = 120, two-sided), the 1% level (critical value: .228, two-sided),  
357 and are significant at the 0.1% level (critical value: .281, two-sided) except for the correlation  
358 between BICSI-AF and PHQ-9 (r = .230). In the civilian sample, all correlation coefficients exceed the  
359 critical values for 5% significance (critical value: .159, n = 160, two-sided) and 1% significance (critical  
360 value: .208, n = 160, two-sided), except for the correlation between Engagement in Meaningful  
361 Activities Scale (EMAS) and Social Anxiety Scale-new situations (SAS-new; r = -.187) and EMAS and  
362 Social Anxiety Scale-general situations (SAS-general; r = -.199). Otherwise, all correlation coefficients  
363 exceed the critical value for the 0.1% level (critical value: .264, n = 160, two-sided), except for the

364 correlation between Multi-dimensional Scale of Perceived Social Support (MSPSS) and Body Esteem  
 365 Scale for Adults and Adolescents – Appearance Subscale (BESAA-AE) ( $r = .255$ ) and the correlation  
 366 between MSPSS and SAS-new ( $r = -.214$ ).

367 Table 4 Pearson correlation coefficients for outcome variables with explanatory variables

|          | <b>Veteran</b>  |       |       |         |             |       |
|----------|-----------------|-------|-------|---------|-------------|-------|
|          | BESAA-AE        | BILEQ | FNAES | SAS-new | SAS-general | PHQ-9 |
| BIAAQ    | .732            | .791  | -.791 | -.598   | -.580       | -.575 |
| BICSI-AF | -.449           | -.422 | .662  | .461    | .329        | .230  |
| PSQ      | -.425           | -.456 | .395  | .354    | .429        | .332  |
| SCS-SF   | .599            | .616  | -.633 | -.518   | -.566       | -.728 |
| EMAS     | .465            | .396  | -.268 | -.311   | -.358       | -.437 |
| LOT-R    | .563            | .625  | -.566 | -.526   | -.509       | -.672 |
| MSPSS    | .313            | .418  | -.289 | -.238   | -.346       | -.449 |
| ITQ      | -.489           | -.655 | .603  | .547    | .516        | .768  |
|          | <b>Civilian</b> |       |       |         |             |       |
|          | BESAA-AE        | BILEQ | FNAES | SAS-new | SAS-general | PHQ-9 |
| BIAAQ    | .698            | .741  | -.716 | -.458   | -.491       | -.601 |
| BICSI-AF | -.570           | -.276 | .779  | .454    | .423        | .366  |
| PSQ      | -.438           | -.556 | .501  | .396    | .433        | .466  |
| SCS-SF   | .621            | .366  | -.655 | -.645   | -.594       | -.664 |
| EMAS     | .468            | .449  | -.415 | -.199   | -.187       | -.500 |
| LOT-R    | .533            | .408  | -.524 | -.535   | -.531       | -.547 |
| MSPSS    | .255            | .281  | -.298 | -.214   | -.343       | -.301 |
| ITQ      | -.508           | -.532 | .574  | .444    | .495        | .628  |

For the veteran sample significance is achieved if: Absolute Correlations > .174 sig (alpha = .05), > .228 sig (alpha = .01), > .289 sig (alpha = .001) two-sided

For the civilian sample significance is achieved if: Absolute Correlations > .159 sig (alpha = .05), > .208 sig (alpha = .01), > .264 sig (alpha = .001) two-sided

368

369 ***Regression model of factors associated with Body Esteem Scale for Adults and Adolescents–***

370 ***Appearance subscale (BESAA-AE)***

371 The regression model for BESAA-AE for the veteran sample ( $R^2 = .621$ ,  $p < .001$ ) and the civilian  
372 sample ( $R^2 = .628$ ,  $p < .001$ ) is given in Table 5. In both models there is a significant and positive  
373 association between body image psychological flexibility (BIAAQ) and BESAA-AE and between  
374 engagement in meaningful activities (EMAS) and BESAA-AE. However, appearance fixing as a coping  
375 strategy (BICSI-AF) and self-compassion (SCS-SF) are associated with BESAA-AE in the civilian model  
376 only. Conclusions are unchanged after multiple imputation (see supplementary Table S1). The  
377 direction of these significant effects aligns with the study hypotheses. The probe “I use humour to  
378 defuse awkward conversations about my injury and/or altered appearance” was negatively related  
379 to BESAA-AE ( $\beta = -0.128$ ,  $p = .048$ ) in the veteran sample but was not significant in the civilian sample  
380 ( $\beta = -.004$ ,  $p = .935$ ). The probe “Being physically fit is important to me” made a significant  
381 contribution to the model in the civilian sample ( $\beta = .116$ ,  $p = .029$ ) but not in the veteran sample ( $\beta$   
382  $= .004$ ,  $p = .955$ ). The probe “I feel disgust when I think about or look at my appearance/body” made  
383 a significant contribution to the model for BESAA-AE in both the veteran sample ( $\beta = -.393$ ,  $p < .001$ )  
384 and the civilian sample ( $\beta = -.517$ ,  $p < .001$ ). Within the veteran model, the probe “Being seen as an  
385 injured veteran is a good thing” made a significant improvement to the modelling of BESAA-AE ( $\beta =$   
386  $+0.173$ ,  $p = .011$ ) as did the probe for total number of years of military service ( $\beta = -0.142$ ,  $p = .026$ ).

387 ***Regression model of factors associated with Body Image Life Engagement (BILEQ)***

388 There are significant effects in the BILEQ model for veterans ( $R^2 = .691$ ,  $p < .001$ ) and civilians ( $R^2 =$   
389  $.608$ ,  $p < .001$ ) as shown in Table 5. In both models, BIAAQ is significantly associated with BILEQ ( $p <$   
390  $.001$ ). However, PTSD (ITQ) is negatively associated with BILEQ but only in the veteran sample,  
391 whereas BICSI-AF, PSQ, SCS-SF and EMAS are each significantly associated with BILEQ but only in the  
392 civilian sample. Conclusions are unchanged after multiple imputation. The direction of the  
393 significant effects aligns with the pre-study hypotheses. The probe “I tend to say to myself it could

394 have been worse" (Binary: 0 = No, 1 = Yes) significantly improved the model in the veteran sample ( $\beta$   
 395 = .128,  $p = .030$ ) but not in the civilian sample ( $\beta = .015$ ,  $p = .777$ ).

396 **Regression model of factors associated with fear of negative appearance evaluation (FNAES)**

397 Significant effects for modelling FNAES are observed in the veteran ( $R^2 = .732$ ,  $p < .001$ ) and civilian  
 398 sample ( $R^2 = .782$ ,  $p < .001$ ) as shown in Table 5. In these models, BIAAQ and BICSI-AF are both  
 399 significantly related to FNAES. SCS-SF is also significantly related to FNAES in the civilian sample  
 400 only. Conclusions are unchanged under multiple imputation. When probing the models, the probe  
 401 variable "I feel disgust when I think about or look at my appearance/body" was significantly  
 402 associated with FNAES in the veteran sample ( $\beta = .260$ ,  $p = .001$ ) and the civilian sample ( $\beta = .172$ ,  $p$   
 403 = .005).

404 Table 5. Regression models for appearance outcome measures

| Measure  | BESAA-AE                  |        |       |                           |        |       |
|----------|---------------------------|--------|-------|---------------------------|--------|-------|
|          | Veteran                   |        |       | Civilian                  |        |       |
|          | Beta                      | t      | p     | Beta                      | t      | p     |
|          | $R^2 = .621$ , $p < .001$ |        |       | $R^2 = .628$ , $p < .001$ |        |       |
| BIAAQ    | .593                      | 5.828  | <.001 | .485                      | 5.869  | <.001 |
| BICSI-AF | -.666                     | -0.858 | .393  | -.175                     | -2.783 | .006  |
| PSQ      | -.002                     | -0.029 | .977  | .061                      | 0.929  | .355  |
| SCS-SF   | .007                      | 0.062  | .951  | .186                      | 2.403  | .017  |
| EMAS     | .254                      | 3.423  | .001  | .153                      | 2.497  | .014  |
| LOT-R    | .054                      | 0.511  | .611  | .101                      | 1.392  | .166  |
| MSPSS    | .006                      | 0.086  | .932  | -.044                     | -0.803 | .423  |
| ITQ      | .003                      | 0.036  | .972  | .054                      | 0.758  | .450  |
| Measure  | BILEQ                     |        |       |                           |        |       |
|          | Veteran                   |        |       | Civilian                  |        |       |
|          | Beta                      | t      | p     | Beta                      | t      | p     |
|          | $R^2 = .691$ , $p < .001$ |        |       | $R^2 = .608$ , $p < .001$ |        |       |
| BIAAQ    | .552                      | 5.986  | <.001 | .658                      | 7.695  | <.001 |
| BICSI-AF | -.024                     | -0.344 | .732  | .151                      | 2.333  | .021  |

|        |       |        |      |       |        |      |
|--------|-------|--------|------|-------|--------|------|
| PSQ    | -.021 | -0.306 | .760 | -.190 | -2.786 | .006 |
| SCS-SF | .005  | 0.056  | .956 | -.187 | -2.358 | .020 |
| EMAS   | .144  | 1.701  | .092 | .188  | 2.981  | .003 |
| LOT-R  | .039  | 0.409  | .683 | .093  | 1.243  | .216 |
| MSPSS  | .079  | 1.182  | .240 | .003  | 0.058  | .954 |
| ITQ    | -.201 | -2.299 | .024 | -.015 | -0.015 | .847 |

**FNAES**

|            | <b>Veteran</b>         |        |       | <b>Civilian</b>        |        |       |
|------------|------------------------|--------|-------|------------------------|--------|-------|
|            | $R^2 = .732, p < .001$ |        |       | $R^2 = .782, p < .001$ |        |       |
|            | Beta                   | t      | p     | Beta                   | t      | p     |
| BIAAQ      | -.450                  | -5.257 | <.001 | -.330                  | -5.211 | <.001 |
| BICSI - AF | .328                   | 5.112  | <.001 | .464                   | 9.630  | <.001 |
| PSQ        | .022                   | 0.347  | .730  | .019                   | 0.382  | .703  |
| SCS-SF     | -.131                  | -1.447 | .151  | -.179                  | -3.007 | .003  |
| EMAS       | -.023                  | -0.363 | .718  | -.009                  | -0.186 | .853  |
| LOT-R      | .038                   | 0.429  | .669  | -.078                  | -1.402 | .163  |
| MSPSS      | .005                   | 0.085  | .932  | -.031                  | -0.725 | .470  |
| ITQ        | .148                   | 1.827  | .071  | -.005                  | -0.085 | .933  |

BESAA-AE: Body Esteem – Appearance Sub-scale; BILEQ: Body Image Life Disengagement; FNAES: Fear of Negative Appearance Evaluation. BIAAQ: Body Image Acceptance and Action (Body Image Psychological Flexibility); BICSI-AF: Body Image Coping Strategies – Appearance Fixing; PSQ: Perceived Stigma; SCS-SF: Self-Compassion; EMAS: Engagement in Meaningful Activities; LOT-R: Optimism; MSPSS: Multidimensional Perceived Social Support; ITQ: International Trauma Questionnaire (PTSD).

405

406 ***Regression model of factors associated with symptoms of depression (PHQ-9)***

407 Table 6 gives the regression model for PHQ-9 with significant effects captured in both the veteran (

408  $R^2 = .706, p < .001$ ) and civilian samples ( $R^2 = .627, p < .001$ ). Both SCS-SF and ITQ are significantly

409 related to PHQ-9 in both samples, and EMAS is significantly related to PHQ-9 in the civilian sample

410 only. The same statistical conclusions are obtained under multiple imputation (see Supplementary

411 Table S2). The direction of the significant effects aligns with the pre-study hypotheses. Probing the

412 PHQ-9 models with non-validated measures did not produce any other statistically significant

413 effects.

414 ***Regression model of factors associated with social anxiety and avoidance in new situations (SAS-***  
415 ***new)***

416 For SAS-new there are significant associations in the veteran ( $R^2 = .524$ ,  $p < .001$ ) and civilian  
417 samples ( $R^2 = .571$ ,  $p < .001$ ) (see Table 6), with BISCI-AF and SCS-SF statistically significant in both  
418 models. However, under multiple imputation, the association between SCS-SF and SAS-new is not  
419 deemed significant in the veteran sample (see supplementary Table S2). EMAS and optimism (LOT-  
420 R) are each significant predictors of SAS-new in the civilian sample but not in the veteran sample.  
421 The direction of the significant effects aligns with the pre-study hypotheses. The variable “I feel  
422 disgust when I think about or look at my appearance/body” was significantly associated with SAS-  
423 new in the civilian sample ( $\hat{\beta} = .182$ ,  $p = .043$ ) but not in the veteran model ( $\hat{\beta} = .025$ ,  $p = .821$ ).  
424 Similarly, the variable “How I think I look inside my own head is the same as how I look to others”  
425 was significantly associated with this outcome in the civilian sample ( $\hat{\beta} = .144$ ,  $p = .029$ ) but not in the  
426 veteran sample ( $\hat{\beta} = .006$ ,  $p = .942$ ). When probing the veteran model, “Being seen as an injured  
427 veteran is a good thing” significantly improved the SAS-new model ( $\hat{\beta} = .158$ ,  $p = .041$ ), as did the  
428 variable “Having other veterans/military personnel close by who are recovering from similar injuries  
429 and changes to their appearance has been helpful” ( $\hat{\beta} = .153$ ,  $p = .046$ ).

430 ***Regression model of factors associated with social anxiety and avoidance in general situations***  
431 ***(SAS-general)***

432 As shown in Table 6, there is some evidence of significant associations in the civilian sample ( $R^2 =$   
433  $.510$ ,  $p < .001$ ) with BISCI-AF, SCS-SF, EMAS, LOT-R, and social support (MSPSS) all related to SAS-  
434 general. However, the evidence of significant associations between measures and SAS-general in the  
435 veteran sample ( $R^2 = .466$ ,  $p < .001$ ) is less compelling because the BIAAQ is deemed significant  
436 when working with complete cases but not under multiple imputation noting  $p = 0.06$  (see Table S2).  
437 When probing the model, the variable “I feel disgust when I think about or look at my

438 appearance/body” was significantly associated with this outcome in the civilian sample ( $\beta = .187$ ,  $p$   
 439  $=.037$ ) but not in the veteran model ( $\beta = .041$ ,  $p =.727$ ).

440 Table 6. Regression models for factors associated with mental health outcome measures

| <b>PHQ-9</b>       |                        |        |       |                        |        |       |
|--------------------|------------------------|--------|-------|------------------------|--------|-------|
| <b>Measure</b>     | <b>Veteran</b>         |        |       | <b>Civilian</b>        |        |       |
|                    | Beta                   | t      | p     | Beta                   | t      | p     |
|                    | $R^2 = .706, p < .001$ |        |       | $R^2 = .627, p < .001$ |        |       |
| BIAAQ              | -.046                  | -0.509 | .612  | -.116                  | -1.402 | .163  |
| BICSI-AF           | -.134                  | -1.985 | .050  | -.076                  | -1.212 | .227  |
| PSQ                | -.010                  | -0.147 | .883  | -.009                  | -0.132 | .895  |
| SCS-SF             | -.229                  | -2.398 | .018  | -.340                  | -4.383 | <.001 |
| EMAS               | -.095                  | -1.453 | .149  | -.185                  | -3.012 | .003  |
| LOT-R              | -.184                  | -1.977 | .051  | -.064                  | -0.890 | .375  |
| MSPSS              | -.088                  | -1.354 | .179  | -.057                  | -1.026 | .306  |
| ITQ                | .442                   | 5.189  | <.001 | .334                   | 4.646  | <.001 |
| <b>SAS-New</b>     |                        |        |       |                        |        |       |
| <b>Measure</b>     | <b>Veteran</b>         |        |       | <b>Civilian</b>        |        |       |
|                    | Beta                   | t      | p     | Beta                   | t      | p     |
|                    | $R^2 = .524, p < .001$ |        |       | $R^2 = .571, p < .001$ |        |       |
| BIAAQ              | -.201                  | -1.760 | .081  | .007                   | 0.077  | .939  |
| BICSI-AF           | .251                   | 2.931  | .004  | .217                   | 3.077  | .003  |
| PSQ                | .071                   | 0.823  | .413  | .074                   | 0.980  | .329  |
| SCS-SF             | -.252                  | -2.082 | .040  | -.428                  | -4.821 | <.001 |
| EMAS               | -.061                  | -0.735 | .464  | .193                   | 2.718  | .007  |
| LOT-R              | .010                   | 0.083  | .934  | -.192                  | -2.313 | .022  |
| MSPSS              | .081                   | 0.979  | .330  | -.026                  | -0.404 | .687  |
| ITQ                | .179                   | 1.648  | .103  | -.086                  | 1.048  | .296  |
| <b>SAS-General</b> |                        |        |       |                        |        |       |
| <b>Measure</b>     | <b>Veteran</b>         |        |       | <b>Civilian</b>        |        |       |
|                    | Beta                   | t      | p     | Beta                   | t      | p     |
|                    | $R^2 = .466, p < .001$ |        |       | $R^2 = .510, p < .001$ |        |       |
| BIAAQ              | -.245                  | -2.023 | .046  | .007                   | 0.071  | .944  |
| BICSI-AF           | .093                   | 1.022  | .309  | .192                   | 2.656  | .009  |

|        |       |        |      |       |        |      |
|--------|-------|--------|------|-------|--------|------|
| PSQ    | .121  | 1.325  | .188 | .112  | 1.490  | .138 |
| SCS-SF | -.251 | -1.954 | .054 | -.293 | -3.288 | .001 |
| EMAS   | -.103 | -1.168 | .246 | .213  | 3.019  | .003 |
| LOT-R  | .055  | 0.439  | .662 | -.201 | -2.418 | .017 |
| MSPSS  | -.051 | -0.583 | .561 | -.182 | -2.866 | .005 |
| ITQ    | .113  | 0.984  | .327 | .162  | 1.964  | .051 |

PHQ-9: Patient Health Questionnaire (Depression symptoms); SAS-New: Social Anxiety in New Situations; SAS-General: Social Anxiety in General. BIAAQ: Body Image Acceptance and Action (Body Image Psychological Flexibility; BICSI-AF: Body Image Coping Strategies – Appearance Fixing; PSQ: Perceived Stigma; SCS-SF: Self-Compassion; EMAS: Engagement in Meaningful Activities; LOT-R: Optimism; MSPSS: Multidimensional Perceived Social Support; ITQ: International Trauma Questionnaire (PTSD).

441

442 **Discussion**

443 This study aimed to fill a gap in understanding the psychosocial support needs of veterans with  
 444 conflict-related AAI. The goal was to identify factors predicting psychosocial adjustment among  
 445 veterans compared to civilians without a military background. The study focused on outcomes  
 446 indicative of adjustment, such as body esteem, body image (BI) life engagement, fear of negative  
 447 appearance evaluation, social anxiety and avoidance, and depression. Potential predictors were  
 448 informed by existing research on civilians with visible differences and insights from a preceding  
 449 qualitative investigation with injured veterans (18).

450 Correlations between predictors and outcomes were all significant and the direction of relationships  
 451 were as hypothesised, and similar between groups. Across both groups, BI psychological flexibility,  
 452 self-compassion, engagement in meaningful activities, optimism and social support were positively  
 453 and significantly correlated with body esteem and life engagement, and negatively and significantly  
 454 correlated with fear of negative appearance evaluation, social anxiety, and depression. Across both  
 455 groups, appearance fixing, perceived stigma and PTSD were negatively and significantly correlated  
 456 with body esteem and life engagement, and positively and significantly correlated with fear of  
 457 negative appearance evaluation, social anxiety, and depression. These findings, combined with  
 458 evidence from regression analyses that our predictor variables explained a high degree of variance in



459 the outcomes, support the conceptualisation of adjustment proposed from the outset, and thus  
460 improve understanding of the key factors that exacerbate and ameliorate appearance-related  
461 distress among those with a visible difference.

462 Overall, civilians and veterans reported similar experiences of living with an AAI, with some key  
463 exceptions. The strength of correlations between self-compassion and BI life engagement, and PTSD  
464 and depression, were significantly stronger among veterans. Veterans also experienced significantly  
465 lower BI psychological flexibility, were more likely to avoid social, recreational, and vocational  
466 activities due to appearance concerns (low BI life engagement), experienced significantly greater  
467 depression and PTSD, and perceived more appearance-related stigmatising behaviours by others.

468 Research suggests a higher prevalence of mental health difficulties, including PTSD, among UK  
469 veterans compared to the public (35). The reasons for these differences in mental health outcomes  
470 remain unclear, although pre-service vulnerabilities (35), trauma specific to military conflict (36),  
471 experiences of transition out of the military (37), and poor help-seeking behaviour (38), are  
472 acknowledged risk factors. While non-appearance related factors likely contribute to the increased  
473 incidence of PTSD and depression among veterans, this study's findings reveal worrying differences  
474 in appearance-related constructs, suggesting they may be more vulnerable to the impact of an AAI.  
475 Despite similarities in body esteem and fear of negative evaluation, increased tendency for lower BI  
476 flexibility, heightened perception of stigmatising behaviour by others, and reduced life engagement,  
477 are outcomes that signify poor coping relative to similar others in the general population and may  
478 account for the stronger relationship between PTSD and depression among veterans. Additionally,  
479 indication that self-compassion may help veterans overcome appearance concerns related to social  
480 activities (BI life engagement) provides preliminary evidence that self-compassion may be a  
481 beneficial target via intervention.

482 Multiple regression analyses determined that **BI psychological flexibility** played the most significant  
483 role in predicting adjustment among both groups. It was strongly associated with all appearance-

484 related outcomes, predicting higher body esteem and BI life engagement and lower fear of negative  
485 appearance evaluation. Lower BI psychological flexibility was also a significant, although not robust,  
486 predictor of heightened social anxiety and avoidance in general situations among veterans.

487 A recent meta-analysis supports the positive role of BI psychological flexibility in adaptive processes  
488 related to body related and mental health indices (39). BI psychological flexibility was consistently  
489 negatively correlated with constructs indicative of body image concerns, depression, anxiety, and  
490 general psychological distress, and positively associated with positive body-related constructs,  
491 including body appreciation and body acceptance. Shepherd et al (2019) reported that psychological  
492 inflexibility (the negative form of psychological flexibility) was positively associated with appearance  
493 anxiety among individuals with a visible burn injury. In a study involving individuals with various  
494 appearance-altering conditions, Zucchelli, White, and Williamson (2020) found that cognitive fusion  
495 and experiential avoidance (negatively valenced components of psychological flexibility) partially  
496 mediated the relationship between body esteem and appearance fixing (a coping strategy),  
497 measured using the BILEQ. Experiential avoidance also partially mediated the relationship between  
498 body esteem and behavioral avoidance. Consequently, activities promoting cognitive *defusion* and  
499 experiential acceptance may benefit individuals with visible differences.

500 Prior research and our findings suggest that BI psychological flexibility may lessen appearance-  
501 related distress in civilians and veterans with AAI. Individuals who embrace body image threats with  
502 kindness and acceptance, rather than resorting to unhelpful strategies like social avoidance, are  
503 more likely to thrive. ACT, a transdiagnostic third-wave cognitive-behavioral therapy and behavior  
504 change model (40), employs techniques to foster psychological flexibility, aiming to help individuals  
505 lead a more fulfilling and meaningful life. These include developing mindfulness to de-identify from  
506 thoughts (cognitive defusion) and open-up to painful emotions (experiential acceptance) and helping  
507 individuals to clarify their values to inform their actions via goal setting (committed action).  
508 Psychologists across Europe have noted the utility of ACT for patients with visible differences

509 (41,42), and there is some empirical research of its effectiveness and suitability in new interventions  
510 (Zucchelli et al., 2022).

511 In both groups, **engagement in meaningful activities** predicted higher body esteem, which is  
512 congruent with findings related to BI psychological flexibility; engaging in meaningful activities  
513 consistent with one's values and needs arguably equates to the process of committed action (acting  
514 towards goals guided by values) that fosters psychological flexibility (45). However, engagement in  
515 meaningful activities only predicted greater BI life engagement and higher social anxiety among  
516 civilians. These significant relationships may exemplify psychological flexibility where individuals  
517 motivated by pursuing values, engage in socially exposing activities despite increased social anxiety.  
518 Absence of this finding in veterans may be related to indications of lower BI psychological flexibility,  
519 perceived appearance-related stigma, and increased avoidance of social activities due to appearance  
520 concerns. Keeling et al. (2022) qualitative research with 23 military participants who sustained AAI  
521 also details the negative impact of intrusive appearance-related social stigma (e.g., being stared at,  
522 being insulted), particularly a depleted sense of social anonymity.

523 ACT-based interventions could benefit both groups, especially veterans. Veterans may also benefit  
524 from social skills training aimed at increasing confidence in managing challenging public situations.  
525 Civilians with visible differences have found this approach helpful (MacBeth & Gumley, 2012;  
526 Norman & Moss, 2014).

527 **Self-compassion** also distinguished veterans from civilians. Lower self-compassion predicted  
528 depression and social anxiety in both groups, consistent with a meta-analysis (47). Only among  
529 civilians did lower self-compassion predict increased fear of appearance evaluation, while higher  
530 self-compassion predicted elevated body esteem. Prior research indicates that veterans may actively  
531 resist self-compassion (Forkus et al., 2020). Distinct from low self-compassion, 'Fear of compassion'  
532 (49) is associated with feeling undeserving, viewing compassion as a weakness that might expose  
533 flaws or infer lowered personal standards, or simply not appreciating its value. Fear of compassion

534 might explain differences between civilians and veterans, with the latter more likely to endorse  
535 military values such as courage, stoicism, and collectivism (50).

536 Both psychological flexibility and self-compassion reflect a common core of mindful (i.e., open, non-  
537 judgmental) awareness concerning emotional distress (51), and processes targeted via ACT are  
538 inherently self-compassionate. Steen et al. (2021) highlighted the benefits of focusing on self-  
539 compassion for veterans, especially those with combat experience, trauma, or PTSD. Our findings  
540 suggest that veterans with AAI could benefit from targeted self-compassion interventions.

541 Civilians showed a relatively greater involvement in **appearance fixing**, concealing worrisome  
542 aspects, or seeking reassurance about appearance. In both groups, engaging in these behaviors  
543 predicted fear of negative appearance evaluation and social anxiety in new situations (e.g., meeting  
544 people for the first time). However, only among civilians did increased engagement in appearance  
545 fixing predict lower body esteem, higher life engagement related to body image, and heightened  
546 social anxiety in general situations (e.g., among peers). These findings highlight the nuanced  
547 relationship between appearance fixing and psychosocial wellbeing. Cash (2005) identified  
548 appearance-fixing tendencies, like body-concealment using clothing, wigs, prosthetics, or extensive  
549 makeup, as an avoidant coping strategy linked to body dissatisfaction and sustained social anxiety.  
550 However, concealment and seeking reassurance may also provide enough social confidence to  
551 encourage participation in appearance-oriented activities that would otherwise be avoided (53). Our  
552 evidence suggests veterans are generally more inclined than civilians to avoid social activities due to  
553 appearance concerns (BI life engagement). Specifically, while veterans engage in appearance fixing  
554 when anxious about new social situations, they do not appear to experience the same benefits as  
555 civilians with low body esteem and high social anxiety, who use appearance fixing to facilitate  
556 engagement in general social, recreational, and vocational activities (BI life engagement). This could  
557 be attributed to veterans' reluctance to engage in behaviors perceived as vain or threatening  
558 masculinity, as indicated by Keeling et al. (2022). This needs consideration when designing veteran-

559 specific interventions, but further exploration is necessary to confirm and understand these  
560 differences.

561 Previous research indicates the benefits of dispositional optimism and engaging social support in  
562 buffering stress effects for civilians with visible differences, especially using social support as a  
563 coping strategy during exposure to feared social situations (e.g., Clarke et al., 2014). Among civilians,  
564 our findings align, with lower optimism associated with increased social anxiety in new situations  
565 and lower social support associated with heightened social anxiety in general situations. However,  
566 this was not observed among the veterans. This was unexpected, given that optimism has been  
567 recognized as a buffer protecting veterans exposed to combat stress from mental health symptoms  
568 like depression and PTSD (54) and, more specific to appearance, findings from Keeling et al. (2022)  
569 where injured veterans discussed the value of positive reframing (i.e., their injuries could have been  
570 fatal or worse), adaptive coping and accepting what they cannot change. In the same qualitative  
571 study, veterans emphasized the benefits of social support, particularly the camaraderie during  
572 rehabilitation. Our findings suggest nuanced differences in beliefs among veterans regarding their  
573 military experiences and their perspectives on appropriate support. Notably, **'believing their injuries**  
574 **could have been worse'** appeared to promote greater BI life engagement, possibly reflecting the use  
575 of downward social comparison as a coping strategy, which was seemingly more pertinent to those  
576 who had frequently witnessed life-changing injuries among, or the death of, comrades. Similarly, the  
577 finding that veterans' belief that **'it is important to recover alongside injured veterans'** increased  
578 social anxiety in new situations suggests that some veterans value or need support from those with  
579 shared experiences to facilitate social engagement. Alternatively, some predictors might not  
580 consistently be significant in the regressions due to high overall R-squared values for the field. This  
581 could make it challenging for another predictor to contribute when key predictors already account  
582 for much of the variance. This might also explain why lower perceived stigma was only associated  
583 with higher BI life engagement among civilians, as veterans overall experienced greater perceived  
584 stigmatization and were more likely to avoid appearance-related social activities.

585 Of the variables measured using questions created by the authors, heightened feelings of **self-**  
586 **disgust** predicted lower body esteem and higher fear of negative evaluation for both groups.  
587 Previous research indicates that physical self-disgust, a visceral revulsion toward oneself, akin to  
588 self-stigma and shame, can arise when individuals perceive their physical appearance violates  
589 societal norms. It is associated with higher body image dissatisfaction in conditions like limb  
590 amputation (55) and has been implicated as a mediating factor between BID and suicidal ideation  
591 among a large non-clinical sample (56). While only drawing evidence from a single item rather than a  
592 validated scale, our findings suggest both veterans and civilians with AAI may benefit from  
593 interventions targeting self-disgust. Powell, Simpson, and Overton (2015) found that self-affirmation  
594 techniques emphasising non-appearance-related traits to bolster self-worth, with a focus on  
595 kindness, reduced appearance-directed disgust. Evidence also indicates the utility of ACT, with a  
596 focus on self-compassion, for addressing self-stigma and shame (58).

597 Other factors influencing body esteem among veterans included perceiving it is '**a good thing to be**  
598 **viewed as a veteran by the public**', predicting higher body esteem, while **using humour** to diffuse  
599 awkward social situations predicted lower body esteem. The former may indicate veterans taking  
600 pride in their service and seeking recognition, potentially guarding against misperceptions or  
601 emasculation judgments related to their injuries. This aligns with values reinforced through military  
602 acculturation (McCaslin et al., 2021). The use of 'dark humour' as an adaptive strategy to cope with  
603 stress, common in the military (59), may promote morale and protect against PTSD (60).

604 Interventions for civilians often recommend the use of humour to manage challenging social  
605 interactions; to appear confident and put others at ease who appear nervous or unsure how to  
606 respond to their visible difference (61). Our findings advise interventionists to be cautious in  
607 assuming that veterans who rely on humour are confident; humour may also reflect vulnerability  
608 (low body esteem) and the need for additional coping strategies.

609 Unsurprisingly, PTSD symptomology was associated with depression across groups, a common  
610 finding (62), but it specifically impacted adjustment by reducing BI life engagement and increasing

611 fear of negative appearance evaluation among veterans. The higher incidence of PTSD among  
612 veterans and its comparatively greater role in appearance-related constructs suggest that  
613 interventions for appearance-related distress among veterans should incorporate a trauma-focused  
614 approach which recognizes the widespread impact and signs of trauma, aiming to prevent re-  
615 traumatization.

### 616 ***Strengths and limitations***

617 This study, one of the first to compare the experiences of military veterans and civilians with  
618 appearance-altering injuries, highlights key differences between the groups which raise important  
619 implications for the design and delivery of psychological interventions. All regression models had  
620 extremely high overall R-squared values and therefore excellent goodness of fit.

621 Limitations include the cross-sectional design, meaning causation cannot be inferred. The self-  
622 selecting recruitment approach has implications for generalisability, potentially leading to  
623 underreported concerns or exclusion of those with significant issues. French et al (2014) reported  
624 that facial and limb injuries were significant predictors of posttraumatic stress, yet hypothesized that  
625 military service members may underreport symptoms, suggesting that the impact of bodily injuries  
626 could be greater than the limited evidence indicates. Generalisability is further limited by the small  
627 proportion of females and those of ethnicities other than white. Despite the models explaining a  
628 high level of variance, unmeasured factors might have influenced the outcomes. Finally, it is noted  
629 that this research focuses on UK military veterans. Due to differences in cultural appearance norms,  
630 health care systems and other military related nuances, generalizability to veterans of other  
631 country's militaries should be conducted cautiously.

### 632 **Conclusion**

633 This novel research confirms the multivariate nature of psychosocial adjustment to an AAI among  
634 civilians and veterans, adding to and further supporting existing evidence. It highlights key  
635 similarities and differences between these groups, indicating that veterans may be more vulnerable

636 to the psychosocial impact of an altered appearance. Key factors associated with adjustment include  
637 BI psychological flexibility, engagement in meaningful activities, and self-compassion. This provides  
638 evidence that ACT-based interventions that include explicit self-compassion activities, as well as  
639 social skills training for managing difficult social situations, may benefit both groups, but particularly  
640 veterans. In addition, this study provides evidence of veteran-specific differences such as the  
641 potential benefit of a perceived positive regard for injured veterans by the public, the use of humour  
642 to manage difficult situations, beliefs about injury, appearance, and the nature of appropriate  
643 support, and heightened PTSD symptoms. These military specific factors should be considered in the  
644 development and provision of interventions, including ensuring a trauma-informed approach is  
645 taken.

#### 646 **Acknowledgements**

647 The authors wish to thank the participants and the study Public Involvement advisors for their time  
648 and sharing their experiences, the study steering committee for their time and contributions, a all  
649 the support services, veteran organisations, NHS services, and individuals, who supported  
650 participant recruitment. The authors wish to acknowledge The Scar Free Foundation for funding the  
651 \*UNITS Study which was being conducted as part of the Centre for Conflict Wound Research using  
652 Libor funds from the Chancellor.

#### 653 **References**

- 654 1. Ministry of Defence. UK Service Personnel amputations: Financial year 2019/2020. 2020  
655 [cited 2021 Mar 8]. Afghanistan and Iraq amputation statistics: 1 April 2015 - 31 March 2020.  
656 Available from: [https://www.gov.uk/government/statistics/uk-service-personnel-](https://www.gov.uk/government/statistics/uk-service-personnel-amputations-financial-year-20192020/afghanistan-and-iraq-amputation-statistics-1-april-2015-to-31-march-2020#contents)  
657 [amputations-financial-year-20192020/afghanistan-and-iraq-amputation-statistics-1-april-](https://www.gov.uk/government/statistics/uk-service-personnel-amputations-financial-year-20192020/afghanistan-and-iraq-amputation-statistics-1-april-2015-to-31-march-2020#contents)  
658 [2015-to-31-march-2020#contents](https://www.gov.uk/government/statistics/uk-service-personnel-amputations-financial-year-20192020/afghanistan-and-iraq-amputation-statistics-1-april-2015-to-31-march-2020#contents)
- 659 2. Clarke A, Thompson AR, Jenkinson E, Rumsey N, Newell R. CBT for Appearance Anxiety:  
660 Psychosocial Interventions for Anxiety due to Visible Difference. John Wiley & Sons; 2014.
- 661 3. Blakeney PE, Rosenberg L, Rosenberg R, Faber AW. Psychosocial care of persons with severe  
662 burns. *Burns*. 2008;34:433–40.



- 663 4. Martin L, Byrnes M, McGarry S, Rea S, Wood F. Social challenges of visible scarring after  
664 severe burn: a qualitative analysis. *Burns*. 2017;43(1):76–83.
- 665 5. Bogart KR, Bryson BA, Harcourt D. Disclosing the obvious: Psychosocial implications of (not)  
666 explaining facial differences. *Body Image*. 2023 Sep;46:91–102.
- 667 6. Rumsey Nichola, Harcourt Diana. Body image and disfigurement: issues and interventions.  
668 *Body Image*. 2004;1(1):83–97.
- 669 7. Shepherd LA. A pilot study exploring the relationship between trauma symptoms and  
670 appearance concerns following burns. *Burns*. 2015;41(2):345–51.
- 671 8. Rumsey N, Bryon-Daniel J, Clarke A, Clarke S, Harcourt D, Jenkinson E, et al. Psychological  
672 factors and processes associated with adjustment to disfiguring conditions. In: Clarke A,  
673 Thompson A, Jenkinson E, Rumsey N, Newell R, editors. *CBT for Appearance Anxiety:  
674 Psychosocial interventions for anxiety due to visible difference*. 2014. p. 194–239.
- 675 9. Attoe C, Pounds-Cornish E. Psychosocial adjustment following burns: An integrative literature  
676 review. *Burns* [Internet]. 2015;41(7):1375–84. Available from:  
677 <https://www.sciencedirect.com/science/article/pii/S0305417915000595>
- 678 10. Hayes SC, Levin ME, Plumb-Villardaga J, Villatte JL, Pistorello J. Acceptance and commitment  
679 therapy and contextual behavioral science: examining the progress of a distinctive model of  
680 behavioral and cognitive therapy. *Behav Ther* [Internet]. 2011/06/01. 2013 Jun;44(2):180–98.  
681 Available from: <https://pubmed.ncbi.nlm.nih.gov/23611068>
- 682 11. Shepherd L, Reynolds DP, Turner A, O’Boyle CP, Thompson AR. The role of psychological  
683 flexibility in appearance anxiety in people who have experienced a visible burn injury. *Burns*  
684 [Internet]. 2019;45(4):942–9. Available from:  
685 <https://www.sciencedirect.com/science/article/pii/S0305417918307666>
- 686 12. Zucchelli F, White P, Williamson H. Experiential avoidance and cognitive fusion mediate the  
687 relationship between body evaluation and unhelpful body image coping strategies in  
688 individuals with visible differences. *Body Image* [Internet]. 2020 Mar;32:121–7. Available  
689 from:  
690 [http://ezproxy.uwe.ac.uk/login?url=http://search.ebscohost.com/login.aspx?direct=true&db](http://ezproxy.uwe.ac.uk/login?url=http://search.ebscohost.com/login.aspx?direct=true&db=cmedm&AN=31869761&site=ehost-live)  
691 [=cmedm&AN=31869761&site=ehost-live](http://ezproxy.uwe.ac.uk/login?url=http://search.ebscohost.com/login.aspx?direct=true&db=cmedm&AN=31869761&site=ehost-live)
- 692 13. Keeling M, Williamson H, Williams V, Kiff J, Harcourt D. Body Image Concerns and  
693 Psychological Wellbeing among Injured Combat Veterans with Scars and Limb Loss: A Review

- 694 of the Literature. *Mil Behav Health* [Internet]. 2020;0(0):1–10. Available from:  
695 <https://doi.org/10.1080/21635781.2020.1792013>
- 696 14. Weaver TL, Walter KH, Chard KM, Bosch J. Residual injury, appearance-related concerns,  
697 symptoms of post-traumatic stress disorder, and depression within a treatment-seeking  
698 veteran sample. *Mil Med*. 2014;179(10):1067–71.
- 699 15. Akyol Y, Tander B, Goktepe AS, Safaz I, Kuru O, Tan AK. Quality of Life in Patients with Lower  
700 Limb Amputation: Does It Affect Post-amputation Pain, Functional Status, Emotional Status  
701 and Perception of Body Image? *J Musculoskelet Pain* [Internet]. 2013;21(4):334–40. Available  
702 from: <https://doi.org/10.3109/10582452.2013.851761>
- 703 16. Messinger SD. Incorporating the prosthetic: traumatic, limb-loss, rehabilitation and refigured  
704 military bodies. *Disabil Rehabil*. 2009/11/06. 2009;31(25):2130–4.
- 705 17. Cater JK. Traumatic amputation: Psychosocial adjustment of six Army women to loss of one  
706 or more limbs. *J Rehabil Res Dev*. 2012;49(10):1443–55.
- 707 18. Keeling M, Williamson H, Williams V, Kiff J, Evans S, Harcourt D. Body image and psychosocial  
708 wellbeing among UK military personnel and veterans who sustained appearance-altering  
709 conflict injuries. *Military Psychology*. 2022;
- 710 19. Tabachnick BG, Fidell LS. *Using Multivariate Statistics*. 6th ed. Pearson; 2013.
- 711 20. Mendelson BK, Mendelson MJ, White DR. Body-Esteem Scale for Adolescents and Adults. *J*  
712 *Pers Assess* [Internet]. 2001;76(1):90–106. Available from:  
713 [https://doi.org/10.1207/S15327752JPA7601\\_6](https://doi.org/10.1207/S15327752JPA7601_6)
- 714 21. Lawrence J, Fauerbach J, Heinberg L, Doctor M, Thombs B. The reliability and validity of the  
715 Perceived Stigmatization Questionnaire (PSQ) and the Social Comfort Questionnaire (SCQ)  
716 among an adult burn survivor sample. *Psychol Assess*. 2006;18:106–11.
- 717 22. Diedrichs P, Atkinson M, Garbett K, Williamson H, Halliwell E, Rumsey N, et al. Randomized  
718 Controlled Trial of an Online Mother-Daughter Body Image and Well-Being Intervention.  
719 *Health Psychology*. 2016;35.
- 720 23. Lundgren J, Anderson D, Thompson J. Fear of negative appearance evaluation: Development  
721 and evaluation of a new construct for risk factor work in the field of eating disorders. *Eat*  
722 *Behav*. 2004;5:75–84.

- 723 24. Ardouin K, Hare J, Stock NM. Emotional Well-Being in Adults Born With Cleft Lip and/or  
724 Palate: A Whole of Life Survey in the United Kingdom. *The Cleft Palate-Craniofacial Journal*  
725 [Internet]. 2020;57(7):877–85. Available from: <https://doi.org/10.1177/1055665619896681>
- 726 25. La Greca A, Lopez N. Social Anxiety Among Adolescents: Linkages with Peer Relations and  
727 Friendships. *J Abnorm Child Psychol*. 1998;26:83–94.
- 728 26. Kroenke K, Spitzer RL, Williams J. The PHQ-9 Validity of a Brief Depression Severity Measure. *J*  
729 *Gen Intern Med*. 2001;16.
- 730 27. Sandoz E, Wilson K, Merwin R, Kellum K. Assessment of body image flexibility: The Body  
731 Image-Acceptance and Action Questionnaire. *J Contextual Behav Sci*. 2013;2:39–48.
- 732 28. Cash TF, Santos MT, Williams EF. Coping with body-image threats and challenges: validation  
733 of the Body Image Coping Strategies Inventory. *J Psychosom Res* [Internet]. 2005;58(2):190–  
734 9. Available from: <https://www.sciencedirect.com/science/article/pii/S0022399904005495>
- 735 29. Teo I, Fronczyk KM, Guindani M, Vannucci M, Ulfers SS, Hanasono MM, et al. Salient body  
736 image concerns of patients with cancer undergoing head and neck reconstruction. *Head Neck*  
737 [Internet]. 2016;38(7):1035–42. Available from:  
738 <https://onlinelibrary.wiley.com/doi/abs/10.1002/hed.24415>
- 739 30. Raes F, Pommier E, Neff K, Gucht D. Construction and Factorial Validation of a Short Form of  
740 the Self-Compassion Scale. *Clin Psychol Psychother*. 2011;18:250–5.
- 741 31. Eakman AM. Measurement characteristics of the engagement in meaningful activities survey  
742 in an age-diverse sample. *Am J Occup Ther*. 2012;66(2):e20–9.
- 743 32. Schou-Bredal I, Heir T, Skogstad L, Bonsaksen T, Lerdal A, Grimholt T, et al. Population-based  
744 norms of the Life Orientation Test–Revised (LOT-R). *International Journal of Clinical and*  
745 *Health Psychology*. 2017;17(3):216–24.
- 746 33. Zimet GD, Powell SS, Farley GK, Werkman S, Berkoff KA. Psychometric Characteristics of the  
747 Multidimensional Scale of Perceived Social Support. *J Pers Assess*. 1990 Dec 1;55(3–4):610–7.
- 748 34. Cloitre M, Shevlin M, Brewin CR, Bisson JI, Roberts NP, Maercker A, et al. The International  
749 Trauma Questionnaire: development of a self-report measure of ICD-11 PTSD and complex  
750 PTSD. *Acta Psychiatr Scand*. 2018;138(6):536–46.
- 751 35. Murphy D, Ashwick R, Palmer E, Busuttill W. Describing the profile of a population of UK  
752 veterans seeking support for mental health difficulties. *Journal of Mental Health*. 2019 Nov  
753 2;28(6):654–61.

- 754 36. Haagen JFG, Smid GE, Knipscheer JW, Kleber RJ. The efficacy of recommended treatments for  
755 veterans with PTSD: A meta-regression analysis. *Clin Psychol Rev.* 2015 Aug;40:184–94.
- 756 37. Ainspan ND, Penk W, Kearney LK. Psychosocial approaches to improving the military-to-  
757 civilian transition process. *Psychol Serv.* 2018 May;15(2):129–34.
- 758 38. Williamson V, Greenberg N, Stevelink SAM. Perceived stigma and barriers to care in UK  
759 Armed Forces personnel and veterans with and without probable mental disorders. *BMC*  
760 *Psychol.* 2019 Dec 27;7(1):75.
- 761 39. Linardon J, Anderson C, Messer M, Rodgers RF, Fuller-Tyszkiewicz M. Body image flexibility  
762 and its correlates: A meta-analysis. *Body Image.* 2021 Jun;37:188–203.
- 763 40. Hayes SC, Pistorello J, Levin ME. Acceptance and Commitment Therapy as a Unified Model of  
764 Behavior Change. *Couns Psychol.* 2012 Oct 26;40(7):976–1002.
- 765 41. Heath J, Williamson H, Williams L, Harcourt D. Parent-perceived isolation and barriers to  
766 psychosocial support: a qualitative study to investigate how peer support might help parents  
767 of burn-injured children. *Scars Burn Heal.* 2018;4.
- 768 42. Harcourt D, Hamlet C, Feragen KB, Garcia-Lopez LJ, Masnari O, Mendes J, et al. The provision  
769 of specialist psychosocial support for people with visible differences: A European survey.  
770 *Body Image.* 2018 Jun;25:35–9.
- 771 43. Zucchelli F, Donnelly O, Rush E, White P, Gwyther H, Williamson H. An Acceptance and  
772 Commitment Therapy Prototype Mobile Program for Individuals With a Visible Difference:  
773 Mixed Methods Feasibility Study. *JMIR Form Res.* 2022 Jan 21;6(1):e33449.
- 774 44. Shepherd L, Turner A, Reynolds DP, Thompson AR. Acceptance and commitment therapy for  
775 appearance anxiety: three case studies. *Scars Burn Heal.* 2020;6:2059513120967584.
- 776 45. Hayes SC, Luoma JB, Bond FW, Masuda A, Lillis J. Acceptance and Commitment Therapy:  
777 Model, processes and outcomes. *Behaviour Research and Therapy.* 2006 Jan;44(1):1–25.
- 778 46. Norman A, Moss TP. Psychosocial interventions for adults with visible differences: A  
779 systematic review. *PeerJ Prepr [Internet].* 2014 Nov 19;3:e870. Available from:  
780 [http://ezproxy.uwe.ac.uk/login?url=http://search.ebscohost.com/login.aspx?direct=true&db](http://ezproxy.uwe.ac.uk/login?url=http://search.ebscohost.com/login.aspx?direct=true&db=cmedm&AN=25861556&site=ehost-live)  
781 [=cmedm&AN=25861556&site=ehost-live](http://ezproxy.uwe.ac.uk/login?url=http://search.ebscohost.com/login.aspx?direct=true&db=cmedm&AN=25861556&site=ehost-live)
- 782 47. MacBeth A, Gumley A. Exploring compassion: A meta-analysis of the association between  
783 self-compassion and psychopathology. *Clin Psychol Rev.* 2012 Aug;32(6):545–52.

- 784 48. Forkus SR, Breines JG, Weiss NH. PTSD and alcohol misuse: Examining the mediating role of  
785 fear of self-compassion among military veterans. *Psychol Trauma*. 2020 May;12(4):364–72.
- 786 49. Gilbert P, McEwan K, Matos M, Rivas A. Fears of compassion: Development of three self-  
787 report measures. *Psychology and Psychotherapy: Theory, Research and Practice*. 2011  
788 Sep;84(3):239–55.
- 789 50. McCaslin SE, Becket-Davenport C, Dinh J V., Lasher B, Kim M, Choucroun G, et al. Military  
790 acculturation and readjustment to the civilian context. *Psychol Trauma*. 2021 Sep;13(6):611–  
791 20.
- 792 51. Neff KD, Dahm KA. Self-Compassion: What It Is, What It Does, and How It Relates to  
793 Mindfulness. In: *Handbook of Mindfulness and Self-Regulation*. New York, NY: Springer New  
794 York; 2015. p. 121–37.
- 795 52. Steen MP, Di Lemma L, Finnegan A, Wepa D, McGhee S. Self-Compassion and Veteran’s  
796 Health: A Scoping Review. *Journal of Veterans Studies*. 2021 Apr 8;7(1):86.
- 797 53. Zucchelli F, Donnelly O, Williamson H, Hooper N. Acceptance and Commitment Therapy for  
798 People Experiencing Appearance-Related Distress Associated With a Visible Difference: A  
799 Rationale and Review of Relevant Research. *J Cogn Psychother [Internet]*. 2018;32(3):171–83.  
800 Available from: <https://app.dimensions.ai/details/publication/pub.1106935549>
- 801 54. Thomas JL, Britt TW, Odle-Dusseau H, Bliese PD. Dispositional optimism buffers combat  
802 veterans from the negative effects of warzone stress on mental health symptoms and work  
803 impairment. *J Clin Psychol*. 2011 Sep;67(9):866–80.
- 804 55. Burden N, Simpson J, Murray C, Overton PG, Powell PA. Prosthesis use is associated with  
805 reduced physical self-disgust in limb amputees. *Body Image*. 2018 Dec;27:109–17.
- 806 56. Akram U, Allen S, Stevenson JC, Lazarus L, Ypsilanti A, Ackroyd M, et al. Self-disgust as a  
807 potential mechanism underlying the association between body image disturbance and  
808 suicidal thoughts and behaviours. *J Affect Disord*. 2022 Jan;297:634–40.
- 809 57. Powell PA, Simpson J, Overton PG. Self-affirming trait kindness regulates disgust toward one’s  
810 physical appearance. *Body Image*. 2015 Jan;12:98–107.
- 811 58. Luoma JB, Platt MG. Shame, self-criticism, self-stigma, and compassion in Acceptance and  
812 Commitment Therapy. *Curr Opin Psychol*. 2015 Apr;2:97–101.

- 813 59. Khraban TYe. Military Dark Humor as a Form of Adaptive Processes and the Individual's  
814 Response to Fear of Death (Psycholinguistic Aspect). Alfred Nobel University Journal of  
815 Philology. 2021;1(21).
- 816 60. Ward RN, Carlson KJ, Erickson AJ, Yalch MM, Brown LM. Associations of humor, morale, and  
817 unit cohesion on posttraumatic stress disorder symptoms. Military Psychology. 2021 Dec  
818 17;1–10.
- 819 61. Bessell A, Brough V, Clarke A, Harcourt D, Moss TP, Rumsey health N. Evaluation of the  
820 effectiveness of Face IT, a computer-based psychosocial intervention for disfigurement-  
821 related distress. Psychol Health Med. 2012;17(5):565–77.
- 822 62. Stander VA, Thomsen CJ, Highfill-McRoy RM. Etiology of depression comorbidity in combat-  
823 related PTSD: A review of the literature. Clin Psychol Rev. 2014 Mar;34(2):87–98.
- 824 63. French LM, Lange RT, Marshall K, Prokhorenko O, Brickell TA, Bailie JM, et al. Influence of the  
825 Severity and Location of Bodily Injuries on Post-Concussive and Combat Stress Symptom  
826 Reporting after Military-Related Concurrent Mild Traumatic Brain Injuries and Polytrauma. J  
827 Neurotrauma. 2014 Oct;31(19):1607–16.
- 828
